# Supplementary material for: Development and Validation of ScriptTaq COVID PCR: An In-House Multiplex rRT-PCR for Low-Cost Detection
Source: MDPI journal article supplement (doi:10.3390/cimb44120417), 2022-12-05
Supplement: s1 [file s1]

**Supplementary Table S1:** Auto Plate Content required for nucleic acid isolation when using ABNOVA SpiralPipet and Autostage System.

| Column | Buffer Solution | Volume      |
|--------|-----------------|-------------|
| 1/7    | Lysis Buffer    | 600 $\mu$ L |
| 2/8    | Wash Buffer I   | 800 $\mu$ L |
| 3/9    | Wash Buffer II  | 800 $\mu$ L |
| 4/10   | Wash Buffer II  | 800 $\mu$ L |
| 5/11   | Magnetic Beads  | 800 $\mu$ L |
| 6/12   | Elution Buffer  | 100 $\mu$ L |

| Step | Well | Action     | RPM  | Time (Second) | CW/CCW (Second) | Temperature | Temperature Control |
|------|------|------------|------|---------------|-----------------|-------------|---------------------|
| 1    | 5/11 | Collection | 0    | 30            | 0               | 60          | YES                 |
| 2    | 1/7  | Mixing     | 3000 | 480           | 0               | 60          | YES                 |
| 3    | 1/7  | Collection | 0    | 30            | 0               | 60          | YES                 |
| 4    | 2/8  | Mixing     | 3000 | 60            | 0               | 45          | YES                 |
| 5    | 2/8  | Collection | 0    | 30            | 0               | 45          | YES                 |
| 6    | 3/9  | Mixing     | 3000 | 60            | 0               | 45          | YES                 |
| 7    | 3/9  | Collection | 0    | 30            | 0               | 45          | YES                 |
| 8    | 4/10 | Mixing     | 3000 | 60            | 0               | 45          | YES                 |
| 9    | 4/10 | Collection | 0    | 30            | 0               | 45          | YES                 |
| 10   | 4/10 | Vapor      | 0    | 300           | 0               | 45          | YES                 |
| 11   | 6/12 | Mixing     | 3000 | 300           | 0               | 45          | YES                 |
| 12   | 6/12 | Collection | 0    | 30            | 0               | 45          | YES                 |
| 13   | 5/11 | Mixing     | 3000 | 60            | 0               | 0           | NO                  |

**Supplementary Table S2:** ABNOVA SpiralPipet and Autostage System program.

| Strain                                                                     | Lineage                  | Target        | Accession  | % Homology<br>Test FP% | % Homology<br>Test RP% | % Homology<br>Test Probe% |
|----------------------------------------------------------------------------|--------------------------|---------------|------------|------------------------|------------------------|---------------------------|
| hCoV-19/Scotland/CVR837/2020                                               | B.1.5                    | N gene, RdRP  | MT882022.1 | 100.0%                 | 100.0%                 | 100.0%                    |
| hCoV-19/Scotland/CVR2224/2020                                              | B.1.222                  | N gene, RdRP  | FR998185.1 | 100.0%                 | 100.0%                 | 100.0%                    |
| hCoV-19/Denmark/DCGC-3024/2020                                             | B.1.1.298                | N gene, RdRP  | MT919525.1 | 100.0%                 | 100.0%                 | 100.0%                    |
| hCoV-19/Japan/TY7-503/2021                                                 | P.1.<br>(or 20J/501Y.V3) | N gene, RdRP  | MZ252337.1 | 100.0%                 | 100.0%                 | 100.0%                    |
| hCoV-19/USA/MD-HP12112/2021                                                | B.1.1.207                | N gene, RdRP  | MW049023.1 | 100.0%                 | 100.0%                 | 100.0%                    |
| hCoV-19/USA/MD-HP12155/2020                                                | B.1.1.4                  | N gene, RdRP  | FR995320.1 | 100.0%                 | 100.0%                 | 100.0%                    |
| hCoV-19/USA/MD-HP01101/2021                                                | B.1.1.7                  | N gene, RdRP  | MZ259007.1 | 100.0%                 | 100.0%                 | 100.0%                    |
| hCoV-19/USA/MD-HP01542/2021                                                | B.1.351                  | N gene, RdRP  | MW580574.1 | 100.0%                 | 100.0%                 | 100.0%                    |
| hCoV-19/USA/NY-NP-DOH1/2021                                                | B.1.526                  | N gene, RdRP  | MZ259007.1 | 100.0%                 | 100.0%                 | 100.0%                    |
| hCoV-19/USA/CA-Stanford-15_S02/2021                                        | B.1.617.1                | N gene, RdRP  | MZ571142.1 | 100.0%                 | 100.0%                 | 100.0%                    |
| Severe acute respiratory syndrome coronavirus 2 TKYTK1734_2021 genomic RNA | B.1.617.2                | N gene, RdRP  | LC633760.1 | 100.0%                 | 100.0%                 | 100.0%                    |
| hCoV-19/USA/NY-MSHSPSP-PV29369/2021                                        | B.1.1.1 (C.7)            | N gene, RdRP  | FR990203.1 | 100.0%                 | 100.0%                 | 100.0%                    |
| hCoV-19/USA/NY-MSHSPSP-PV28887/2021                                        | R.1                      | N gene, RdRP, | BS001048.1 | 100.0%                 | 100.0%                 | 100.0%                    |
| BA.1 (omicron)                                                             | B.1.1.529                | N gene, RdRP  | OL869974.1 | 100.0%                 | 100.0%                 | 100%                      |

**Supplementary Table S3:** Representative results of *In Silico* analysis for inhouse COVID-19 Multiplex rRT-PCR against the reported 2019-nCoV Lineage sequences by February 14, 2022.

| Virus                         | Source/ Sample type | Ct Value (RdRP gene/N Gene) |
|-------------------------------|---------------------|-----------------------------|
| MERS-coronavirus (18 Samples) | Clinical specimen   | Undetected                  |
| Influenza A (20 Samples)      | Clinical specimen   | Undetected                  |
| Influenza B (18 Samples)      | Clinical specimen   | Undetected                  |
| Rhinovirus (19 Samples)       | Clinical specimen   | Undetected                  |

**Supplementary Table S4:** Cross-Reactivity of inhouse COVID-19 Multiplex rRT-PCR.

| Pathogen (Taxonomy ID)              | Strain                             | Target    | GenBank Acc#    | % Homology<br>Test FP | % Homology<br>Test RP | % Homology Test<br>Probe |
|-------------------------------------|------------------------------------|-----------|-----------------|-----------------------|-----------------------|--------------------------|
| Human coronavirus 229E (11137)      | camel/Abu Dhabi/B38                | N gene    | MF593473.1      | 76.20%                | 62.50%                | 54.80%                   |
| Human coronavirus 229E (11137)      | camel/Abu Dhabi/B38                | RdRP gene | MF593473.1      | 81.00%                | 62.50%                | 72.00%                   |
| Human coronavirus OC43 (31631)      | HCoV_OC43/Seattle/USA/SC9 428/2018 | N gene    | MN310476.1      | 86.40%                | 67.94%                | 83.30%                   |
| Human coronavirus OC43 (31631)      | HCoV_OC43/Seattle/USA/SC9 428/2018 | RdRP gene | MN310476.1      | 86.40%                | 76.90%                | 45.80%                   |
| Human coronavirus HKU1 (290028)     | HKU1 SC2628                        | N gene    | KY983584.1      | 70.00%                | 45.50%                | 70.80%                   |
| Human coronavirus HKU1 (290028)     | HKU1 SC2628                        | RdRP gene | KY983584.1      | 90.90%                | 80.80%                | 43.20%                   |
| Human coronavirus NL63 (277944)     | HCoV_NL63/Seattle/USA/SC0 179/2018 | N gene    | MN306018.1      | 70.00%                | 43.20%                | 70.80%                   |
| Human coronavirus NL63 (277944)     | HCoV_NL63/Seattle/USA/SC0 179/2018 | RdRP gene | MN306018.1      | 82.60%                | 88.00%                | 72.00%                   |
| MERS-CoV (1335626)                  | BtVs-BetaCoV/SC2013                | N gene    | KJ473821.1      | 75.00                 | 58.30%                | 55.90%                   |
| MERS-CoV (1335626)                  | BtVs-BetaCoV/SC2013                | RdRP gene | KJ473821.1      | 66.70%                | 92.00%                | 57.60%                   |
| Adenoviridae (10508)                | 53/FS161/Fukui/2004                | N gene    | AB568098.1      | 70.00%                | 65.40%                | 50.00%                   |
| Adenoviridae (10508)                | 53/FS161/Fukui/2004                | RdRP gene | AB568098.1      | 82.60%                | 65.60%                | 73.10%                   |
| Adenoviridae (10508)                | ITA/2018/251170-16                 | N gene    | MK625182.1      | 84.20%                | 54.50%                | 52.60%                   |
| Adenoviridae (10508)                | ITA/2018/251170-16                 | RdRP gene | MK625182.1      | 59.30%                | 42.30%                | 60.60%                   |
| Human metapneumovirus (162145)      | bj0154                             | N gene    | MN745086.1      | 70.00%                | 45.80%                | 68.00%                   |
| Human metapneumovirus (162145)      | bj0154                             | RdRP gene | MN745086.1      | 37.20%                | 56.20%                | 50.00%                   |
| Human metapneumovirus (162145)      | C-85473                            | N gene    | KM408077.1      | 60.90%                | Not Sig               | 43.60%                   |
| Human metapneumovirus (162145)      | C-85473                            | RdRP gene | KM408077.1      | 60.70%                | Not Sig               | 60.00%                   |
| Paramyxoviridae (11158)             | MVs/Venezia.ITA/22.17/3[D8]        | N gene    | MK513627.1      | 77.80%                | 69.60%                | 61.30%                   |
| Paramyxoviridae (11158)             | HPIV3/MEX/2822/2006                | RdRP gene | KF687324.1      | 71.40%                | 65.40%                | 54.30%                   |
| Orthomyxoviridae (11308)            | A/Homo sapien/China/LS314/2019     | N gene    | MT106847.1      | 76.20%                | 67.90%                | 63.00%                   |
| Influenza A virus (11320)           | A/sanderling/New Jersey/756/1986   | RdRP gene | CY117434.1      | 56.70%                | 57.70%                | 37.70%                   |
| Orthomyxoviridae (11308)            | A/sanderling/New Jersey/756/1986   | N gene    | CY117434.1      | 77.30%                | 64.00%                | 54.80%                   |
| Influenza B virus (11520)           | B/New York/20/2018                 | N gene    | MK999210.1      | 43.80%                | 66.70%                | 66.70%                   |
| Influenza B virus (11520)           | B/Alabama/12/2019                  | RdRP gene | MT029398.1      | 51.90%                | 61.50%                | 50.00%                   |
| Enterovirus (12059)                 | Donovan                            | N gene    | AY421766.1      | 65.00%                | 60.70%                | 48.60%                   |
| Rhinovirus (12059)                  | Donovan                            | RdRP gene | AY421766.1      | 70.00%                | 66.70%                | 64.50%                   |
| Enterovirus (12059)                 | PS87/Belfast; ATCC VR-774          | RdRP gene | DQ092794.1      | 72.70%                | 66.70%                | 52.90%                   |
| Respiratory syncytial virus (12814) | B/WI/629-Q0306/10                  | N gene    | JN032121.2      | 68.20%                | 68.20%                | 59.30%                   |
| Respiratory syncytial virus (12814) | 99-901                             | RdRP gene | MK947359.1      | 43.20%                | 47.20%                | 40.00%                   |
| Rhinovirus (12059)                  | PS-87                              | RdRP gene | X79368.1        | 58.10%                | 66.70%                | 65.40%                   |
| SARSr-CoV (694009)                  | SARS coronavirus Frankfurt 1       | N gene    | AB257344.1      | 69.60%                | 91.70%                | 95.70%                   |
| SARSr-CoV (694009)                  | SARS coronavirus Frankfurt 1       | RdRP gene | AB257344.1      | 95.50%                | 96.20%                | 88.00%                   |
| hCoV-19/pangolin/Guangxi/P4L/ 2017  | -                                  | N gene    | EPI_ISL_410 538 | 61.10%                | 46.70%                | 45.70%                   |
| hCoV- 19/pangolin/Guangxi/P4L/2017  | -                                  | RdRP gene | EPI_ISL_410 538 | 45.50%                | 69.20%                | 65.20%                   |
| Bat coronavirus                     |                                    | N gene    | NC_048212.1     | 62.50%                | 76.90%                | 56.20%                   |
| Bat coronavirus                     |                                    | RdRP gene | NC_048212.1     | 72.70%                | 84.60%                | 82.60%                   |

**Supplementary Table S5:** The *In Silico* Specificity Analysis of Primer and Probe Sets for Other Respiratory Pathogens.
